# Supplementary material for: China's application of the One Health approach in addressing public health threats at the human-animal-environment interface: Advances and challenges
Source: PubMed Central journal article supplement — One Health. 2023 Jul 24;17:100607. doi: 10.1016/j.onehlt.2023.100607 (PMC10425407; doi:10.1016/j.onehlt.2023.100607), 2023-07-24
Supplement: mmc1.pdf [file mmc1.pdf]

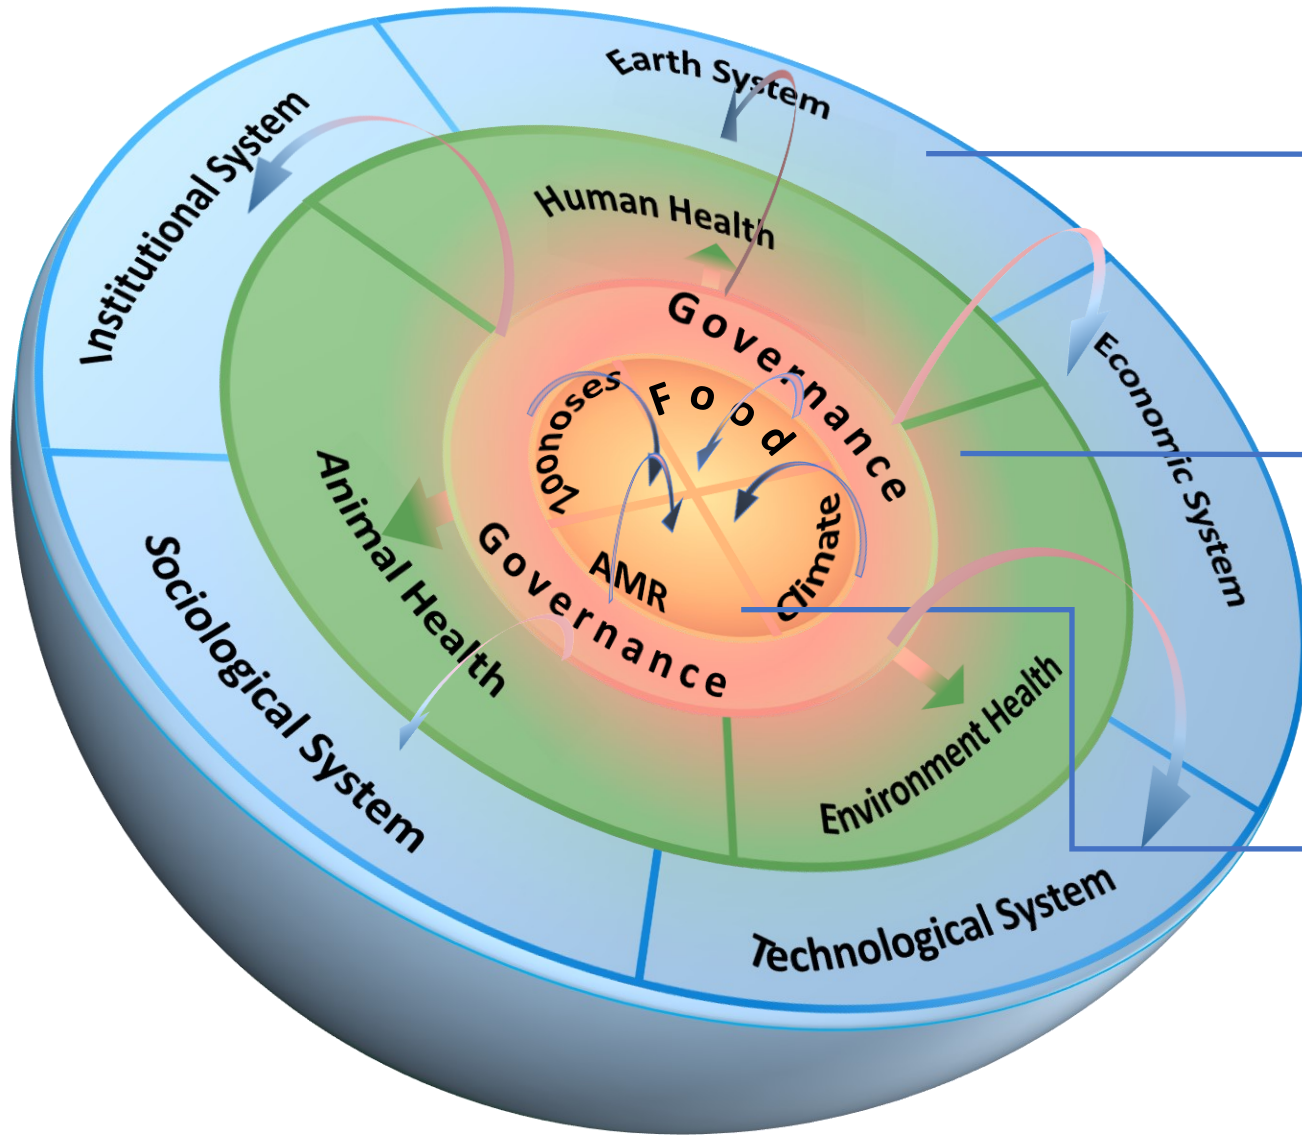

**External drivers index (EDI):** Used to assess the social, economic, cultural and other factors affecting One Health development, including the earth system, economic system, technological system, sociological system and institutional system

**Intrinsic drivers index (IDI):** Formed to assess One Health practice at the interfaces of human health, animal health and environment health

**Core drivers index (CDI):** Created to evaluate One Health implementation in the management of core scientific fields, including emerging zoonotic infectious diseases, food security, antimicrobial resistance (AMR), climate change and governance
