# Supplementary material for: China's application of the One Health approach in addressing public health threats at the human-animal-environment interface: Advances and challenges
Source: PubMed Central journal article supplement — One Health. 2023 Jul 24;17:100607. doi: 10.1016/j.onehlt.2023.100607 (PMC10425407; doi:10.1016/j.onehlt.2023.100607), 2023-07-24
Supplement: mmc6.pdf [file mmc6.pdf]

China's application of the One Health approach in addressing public health threats at the human-animal-environment interface: Advances and challenges

Appendix C: STROBE Statement

|                           | Item No. | Recommendation                                                                                                                                                                                                                                                                                                                                                                                                                                                         | Page No. | Relevant text from manuscript                                                                                                                                                                            |
|---------------------------|----------|------------------------------------------------------------------------------------------------------------------------------------------------------------------------------------------------------------------------------------------------------------------------------------------------------------------------------------------------------------------------------------------------------------------------------------------------------------------------|----------|----------------------------------------------------------------------------------------------------------------------------------------------------------------------------------------------------------|
| <b>Title and abstract</b> | 1        | (a) Indicate the study's design with a commonly used term in the title or the abstract                                                                                                                                                                                                                                                                                                                                                                                 |          | The methods, findings and interpretation of the abstract indicate our study design of observational study.                                                                                               |
|                           |          | (b) Provide in the abstract an informative and balanced summary of what was done and what was found                                                                                                                                                                                                                                                                                                                                                                    |          | The abstract summarizes the background, methods and findings and conclusions of the study.                                                                                                               |
| <b>Introduction</b>       |          |                                                                                                                                                                                                                                                                                                                                                                                                                                                                        |          |                                                                                                                                                                                                          |
| Background/rationale      | 2        | Explain the scientific background and rationale for the investigation being reported                                                                                                                                                                                                                                                                                                                                                                                   |          | The Introduction well explain the scientific background and rational for this study.                                                                                                                     |
| Objectives                | 3        | State specific objectives, including any prespecified hypotheses                                                                                                                                                                                                                                                                                                                                                                                                       |          | The objectives can be found in the last paragraph of the Introduction session.                                                                                                                           |
| <b>Methods</b>            |          |                                                                                                                                                                                                                                                                                                                                                                                                                                                                        |          |                                                                                                                                                                                                          |
| Study design              | 4        | Present key elements of study design early in the paper                                                                                                                                                                                                                                                                                                                                                                                                                |          | The key elements of study design are presented in the first few sentences of each paragraph in the Materials and methods.                                                                                |
| Setting                   | 5        | Describe the setting, locations, and relevant dates, including periods of recruitment, exposure, follow-up, and data collection                                                                                                                                                                                                                                                                                                                                        |          | They are described in the first sub-section of the Materials and methods. Note that the study uses the group data from the published article and therefore does not involve recruitment, follow-up, etc. |
| Participants              | 6        | (a) <i>Cohort study</i> —Give the eligibility criteria, and the sources and methods of selection of participants. Describe methods of follow-up<br><i>Case-control study</i> —Give the eligibility criteria, and the sources and methods of case ascertainment and control selection. Give the rationale for the choice of cases and controls<br><i>Cross-sectional study</i> —Give the eligibility criteria, and the sources and methods of selection of participants |          | The study uses secondary panel data (group level) for analysis and therefore does not involve selection of participants for quantitative data collection.                                                |
|                           |          | (b) <i>Cohort study</i> —For matched studies, give matching criteria and number of exposed and unexposed                                                                                                                                                                                                                                                                                                                                                               |          | N/A                                                                                                                                                                                                      |

|                              |    |                                                                                                                                                                                      |                                                                                                                                                                                                                                       |
|------------------------------|----|--------------------------------------------------------------------------------------------------------------------------------------------------------------------------------------|---------------------------------------------------------------------------------------------------------------------------------------------------------------------------------------------------------------------------------------|
|                              |    | <i>Case-control study</i> —For matched studies, give matching criteria and the number of controls per case                                                                           |                                                                                                                                                                                                                                       |
| Variables                    | 7  | Clearly define all outcomes, exposures, predictors, potential confounders, and effect modifiers. Give diagnostic criteria, if applicable                                             | The key variables of the study are the indicators of global One Health index (GOHI) classified according to Structure-Process-Outcome (SPO) model, which are described in the fifth and sixth paragraph of the Materials and methods. |
| Data sources/<br>measurement | 8* | For each variable of interest, give sources of data and details of methods of assessment (measurement). Describe comparability of assessment methods if there is more than one group | Described in the Materials and methods and in the Appendix C.                                                                                                                                                                         |
| Bias                         | 9  | Describe any efforts to address potential sources of bias                                                                                                                            | N/A                                                                                                                                                                                                                                   |
| Study size                   | 10 | Explain how the study size was arrived at                                                                                                                                            | N/A                                                                                                                                                                                                                                   |

Continued on next page

|                        |     |                                                                                                                                                                                                                                                                                                           |                                                                         |
|------------------------|-----|-----------------------------------------------------------------------------------------------------------------------------------------------------------------------------------------------------------------------------------------------------------------------------------------------------------|-------------------------------------------------------------------------|
| Quantitative variables | 11  | Explain how quantitative variables were handled in the analyses. If applicable, describe which groupings were chosen and why                                                                                                                                                                              | Described in the Materials and methods.                                 |
| Statistical methods    | 12  | (a) Describe all statistical methods, including those used to control for confounding                                                                                                                                                                                                                     | Described in the Materials and methods.                                 |
|                        |     | (b) Describe any methods used to examine subgroups and interactions                                                                                                                                                                                                                                       | N/A                                                                     |
|                        |     | (c) Explain how missing data were addressed                                                                                                                                                                                                                                                               | N/A                                                                     |
|                        |     | (d) <i>Cohort study</i> —If applicable, explain how loss to follow-up was addressed<br><i>Case-control study</i> —If applicable, explain how matching of cases and controls was addressed<br><i>Cross-sectional study</i> —If applicable, describe analytical methods taking account of sampling strategy | N/A                                                                     |
|                        |     | (e) Describe any sensitivity analyses                                                                                                                                                                                                                                                                     | N/A                                                                     |
| <b>Results</b>         |     |                                                                                                                                                                                                                                                                                                           |                                                                         |
| Participants           | 13* | (a) Report numbers of individuals at each stage of study—eg numbers potentially eligible, examined for eligibility, confirmed eligible, included in the study, completing follow-up, and analysed                                                                                                         | N/A                                                                     |
|                        |     | (b) Give reasons for non-participation at each stage                                                                                                                                                                                                                                                      | N/A                                                                     |
|                        |     | (c) Consider use of a flow diagram                                                                                                                                                                                                                                                                        | N/A                                                                     |
| Descriptive data       | 14* | (a) Give characteristics of study participants (eg demographic, clinical, social) and information on exposures and potential confounders                                                                                                                                                                  | N/A                                                                     |
|                        |     | (b) Indicate number of participants with missing data for each variable of interest                                                                                                                                                                                                                       | N/A                                                                     |
|                        |     | (c) <i>Cohort study</i> —Summarise follow-up time (eg, average and total amount)                                                                                                                                                                                                                          | N/A                                                                     |
| Outcome data           | 15* | <i>Cohort study</i> —Report numbers of outcome events or summary measures over time                                                                                                                                                                                                                       |                                                                         |
|                        |     | <i>Case-control study</i> —Report numbers in each exposure category, or summary measures of exposure                                                                                                                                                                                                      |                                                                         |
|                        |     | <i>Cross-sectional study</i> —Report numbers of outcome events or summary measures                                                                                                                                                                                                                        | GOHI indicators are presented in Table A.1 in Appendix A.               |
| Main results           | 16  | (a) Give unadjusted estimates and, if applicable, confounder-adjusted estimates and their precision (eg, 95% confidence interval). Make clear which confounders were adjusted for and why they were included                                                                                              | Presented in Table 1, 2, and Figure 1, 2, 3 and throughout the Results. |
|                        |     | (b) Report category boundaries when continuous variables were categorized                                                                                                                                                                                                                                 | Presented in the legend of Figure 1.                                    |
|                        |     | (c) If relevant, consider translating estimates of relative risk into absolute risk for a meaningful time period                                                                                                                                                                                          | N/A                                                                     |

Continued on next page

|                          |    |                                                                                                                                                                            |                                                                     |
|--------------------------|----|----------------------------------------------------------------------------------------------------------------------------------------------------------------------------|---------------------------------------------------------------------|
| Other analyses           | 17 | Report other analyses done—eg analyses of subgroups and interactions, and sensitivity analyses                                                                             | N/A                                                                 |
| <b>Discussion</b>        |    |                                                                                                                                                                            |                                                                     |
| Key results              | 18 | Summarise key results with reference to study objectives                                                                                                                   | Discussed in the first, second and third sub-section of Discussion. |
| Limitations              | 19 | Discuss limitations of the study, taking into account sources of potential bias or imprecision. Discuss both direction and magnitude of any potential bias                 | Discussed in the last paragraph of the Discussion.                  |
| Interpretation           | 20 | Give a cautious overall interpretation of results considering objectives, limitations, multiplicity of analyses, results from similar studies, and other relevant evidence | Discussed in the last sub-section of the Discussion.                |
| Generalisability         | 21 | Discuss the generalisability (external validity) of the study results                                                                                                      | Discussed in the Conclusion.                                        |
| <b>Other information</b> |    |                                                                                                                                                                            |                                                                     |
| Funding                  | 22 | Give the source of funding and the role of the funders for the present study and, if applicable, for the original study on which the present article is based              | Presented in the Funding.                                           |

\*Give information separately for cases and controls in case-control studies and, if applicable, for exposed and unexposed groups in cohort and cross-sectional studies.

**Note:** An Explanation and Elaboration article discusses each checklist item and gives methodological background and published examples of transparent reporting. The STROBE checklist is best used in conjunction with this article (freely available on the Web sites of PLoS Medicine at <http://www.plosmedicine.org/>, Annals of Internal Medicine at <http://www.annals.org/>, and Epidemiology at <http://www.epidem.com/>). Information on the STROBE Initiative is available at [www.strobe-statement.org](http://www.strobe-statement.org).
